# Supplementary material for: The Subtype Selectivity in Search of Potent Hypotensive Agents among 5,5-Dimethylhydantoin Derived α1-Adrenoceptors Antagonists
Source: MDPI journal article supplement (doi:10.3390/ijms242316609), 2023-11-22
Supplement: s1 [file s1]

## Supplementary materials

### The subtype selectivity in search of potent hypotensive agents among 5,5-dimethylhydantoin derived $\alpha$ 1-adrenoceptors antagonists

Aneta Kaczor <sup>1†</sup>, Joanna Knutelska <sup>2†</sup>, Katarzyna Kucwaj-Brysz <sup>1</sup>, Małgorzata Zygmunt <sup>2</sup>, Ewa Żesławska <sup>3</sup>, Agata Siwek <sup>4</sup>, Marek Bednarski <sup>2</sup>, Sabina Podlewska <sup>5</sup>, Magdalena Jastrzębska-Więsek <sup>6</sup>, Wojciech Nitek <sup>7</sup>, Jacek Sapa <sup>2</sup> and Jadwiga Handzlik <sup>1,\*</sup>

|                                                         |              |
|---------------------------------------------------------|--------------|
| <b><sup>1</sup>HNMRs for final compounds.....</b>       | <b>2-13</b>  |
| <b>The synthetic procedure for intermediate 17.....</b> | <b>14</b>    |
| <b>The influence on blood pressure in rats.....</b>     | <b>15-16</b> |

**$^1\text{H}$ NMRs**  
**for final products obtained within the studies**

# Compound 1

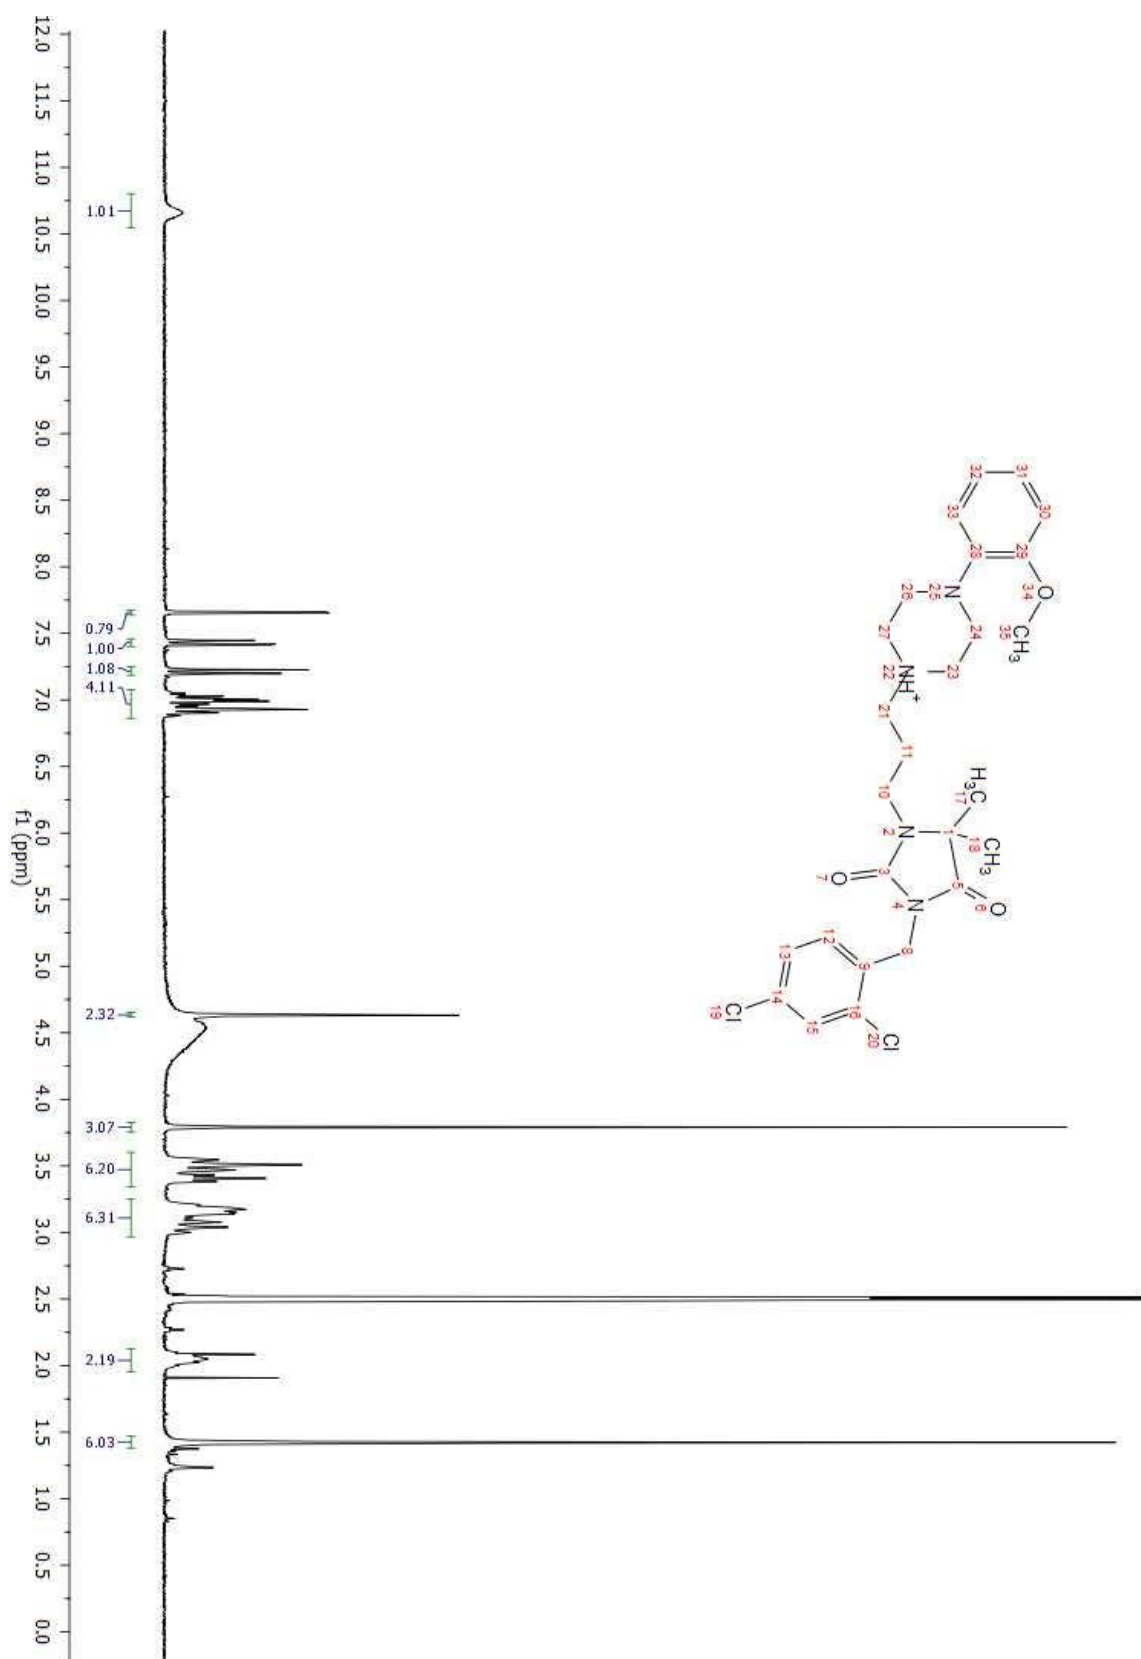

# Compound 2

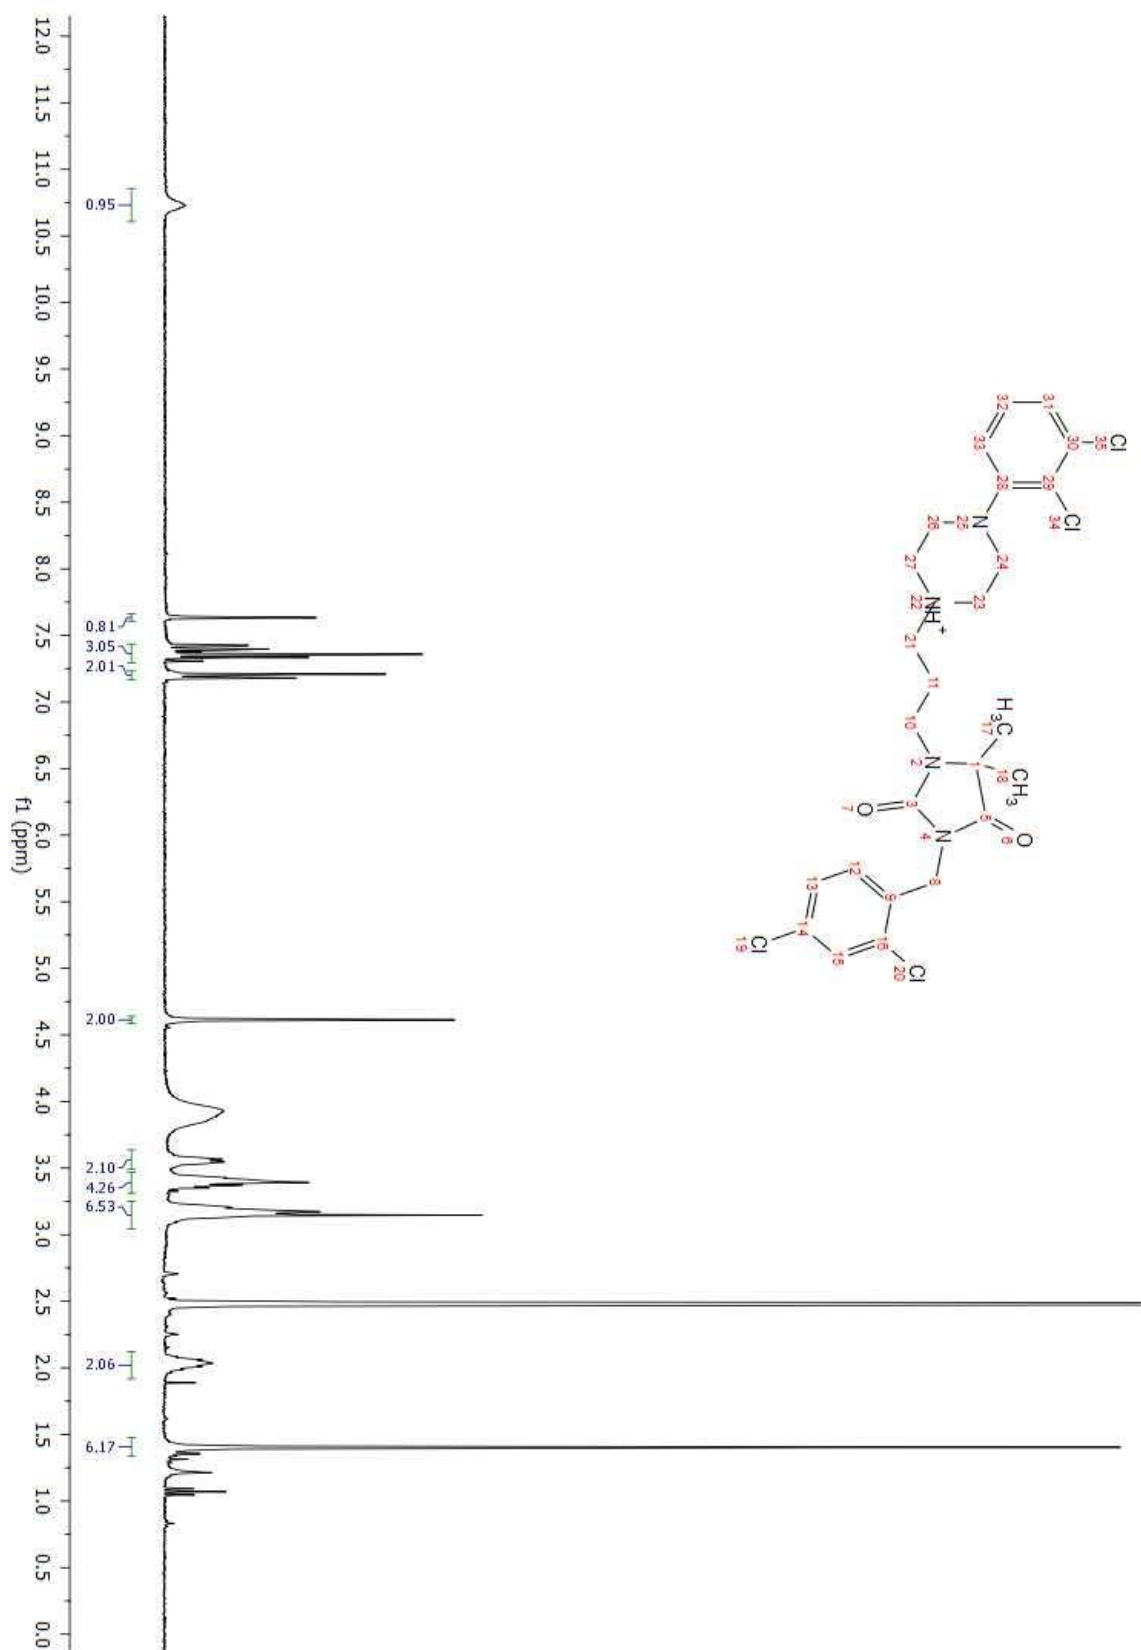

# Compound 3

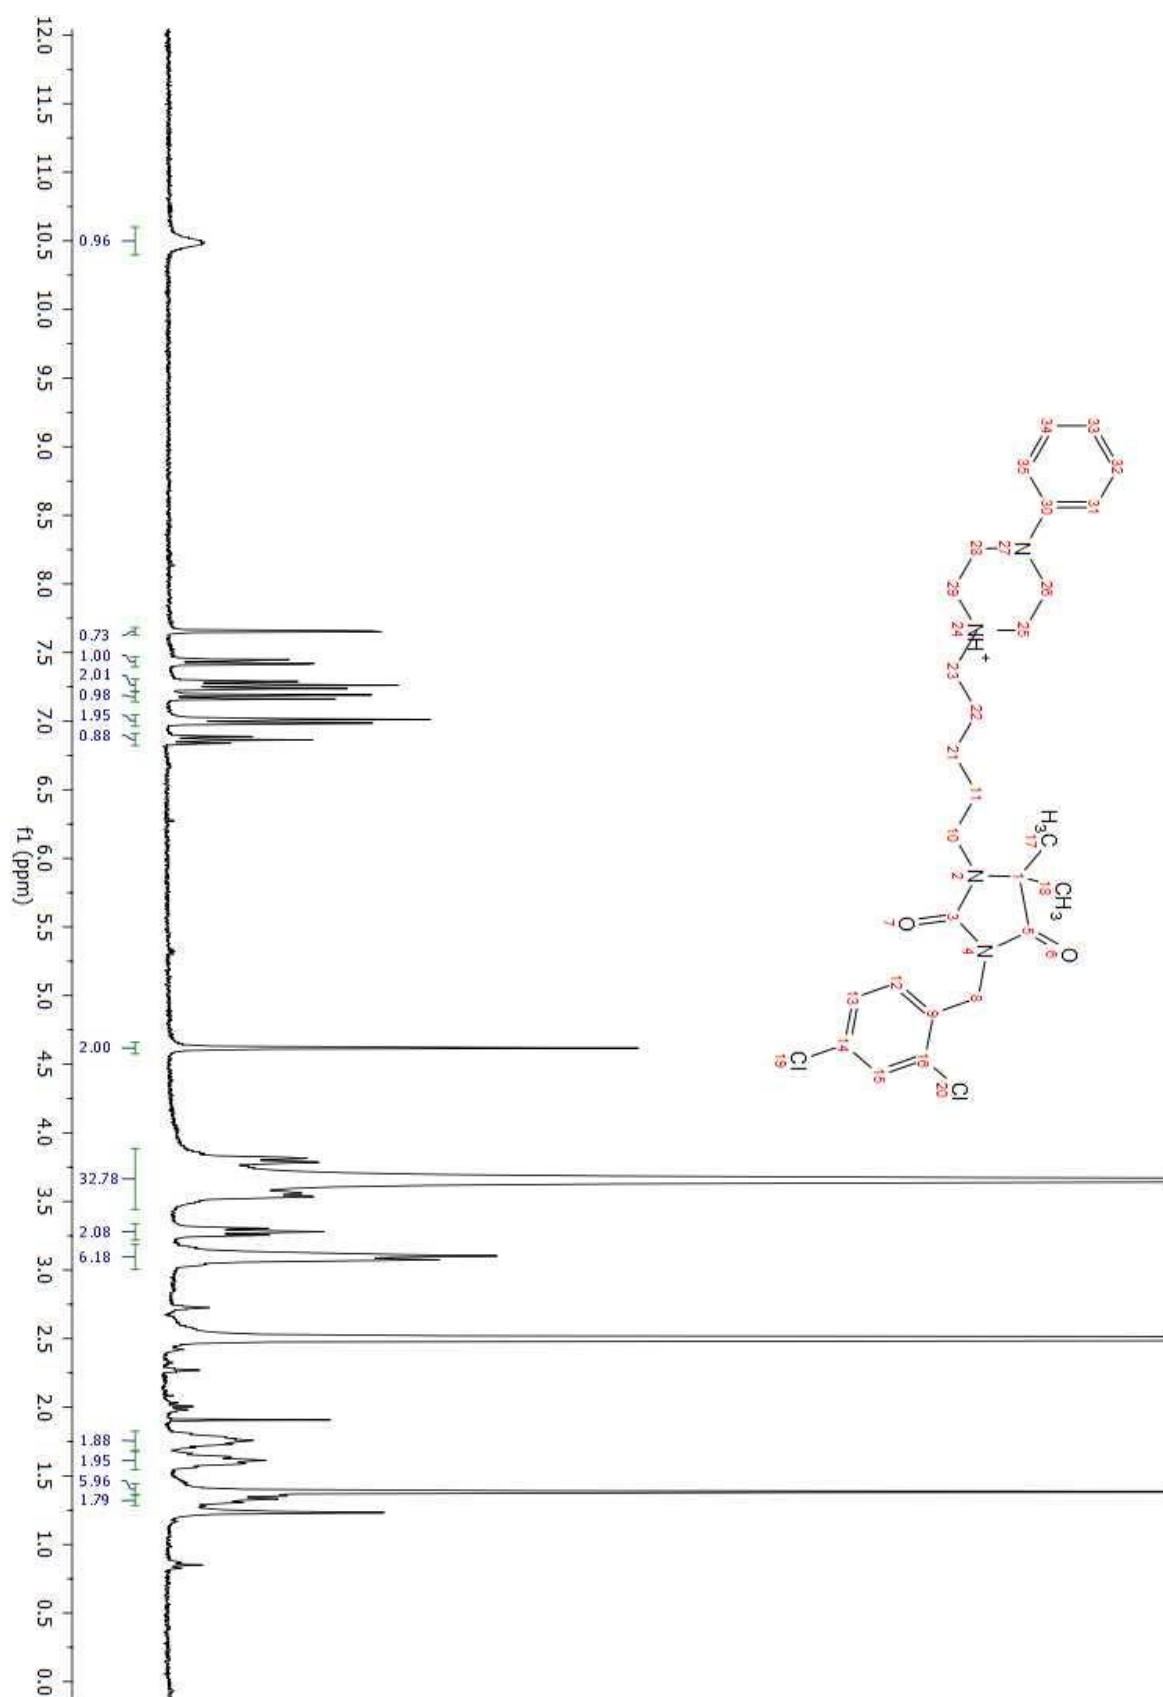

# Compound 4

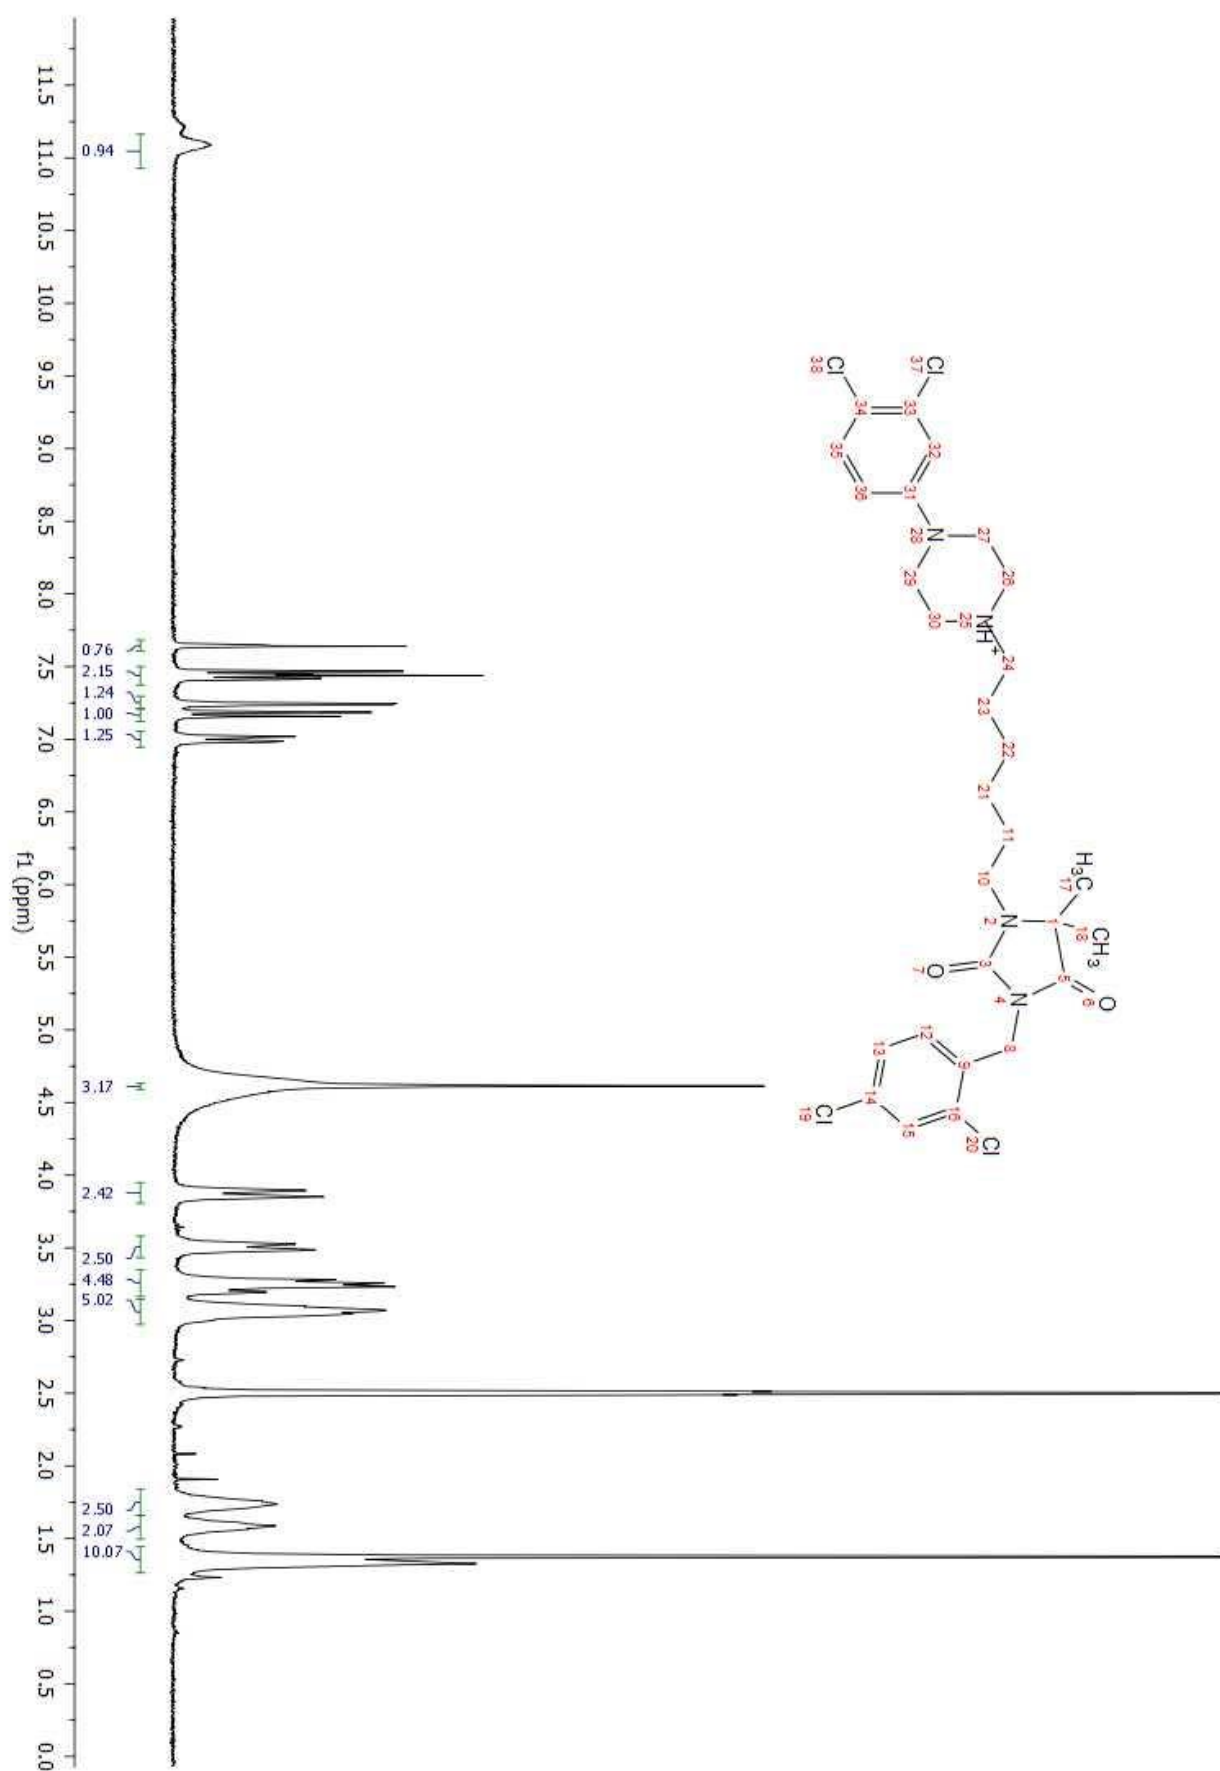

# Compound 5

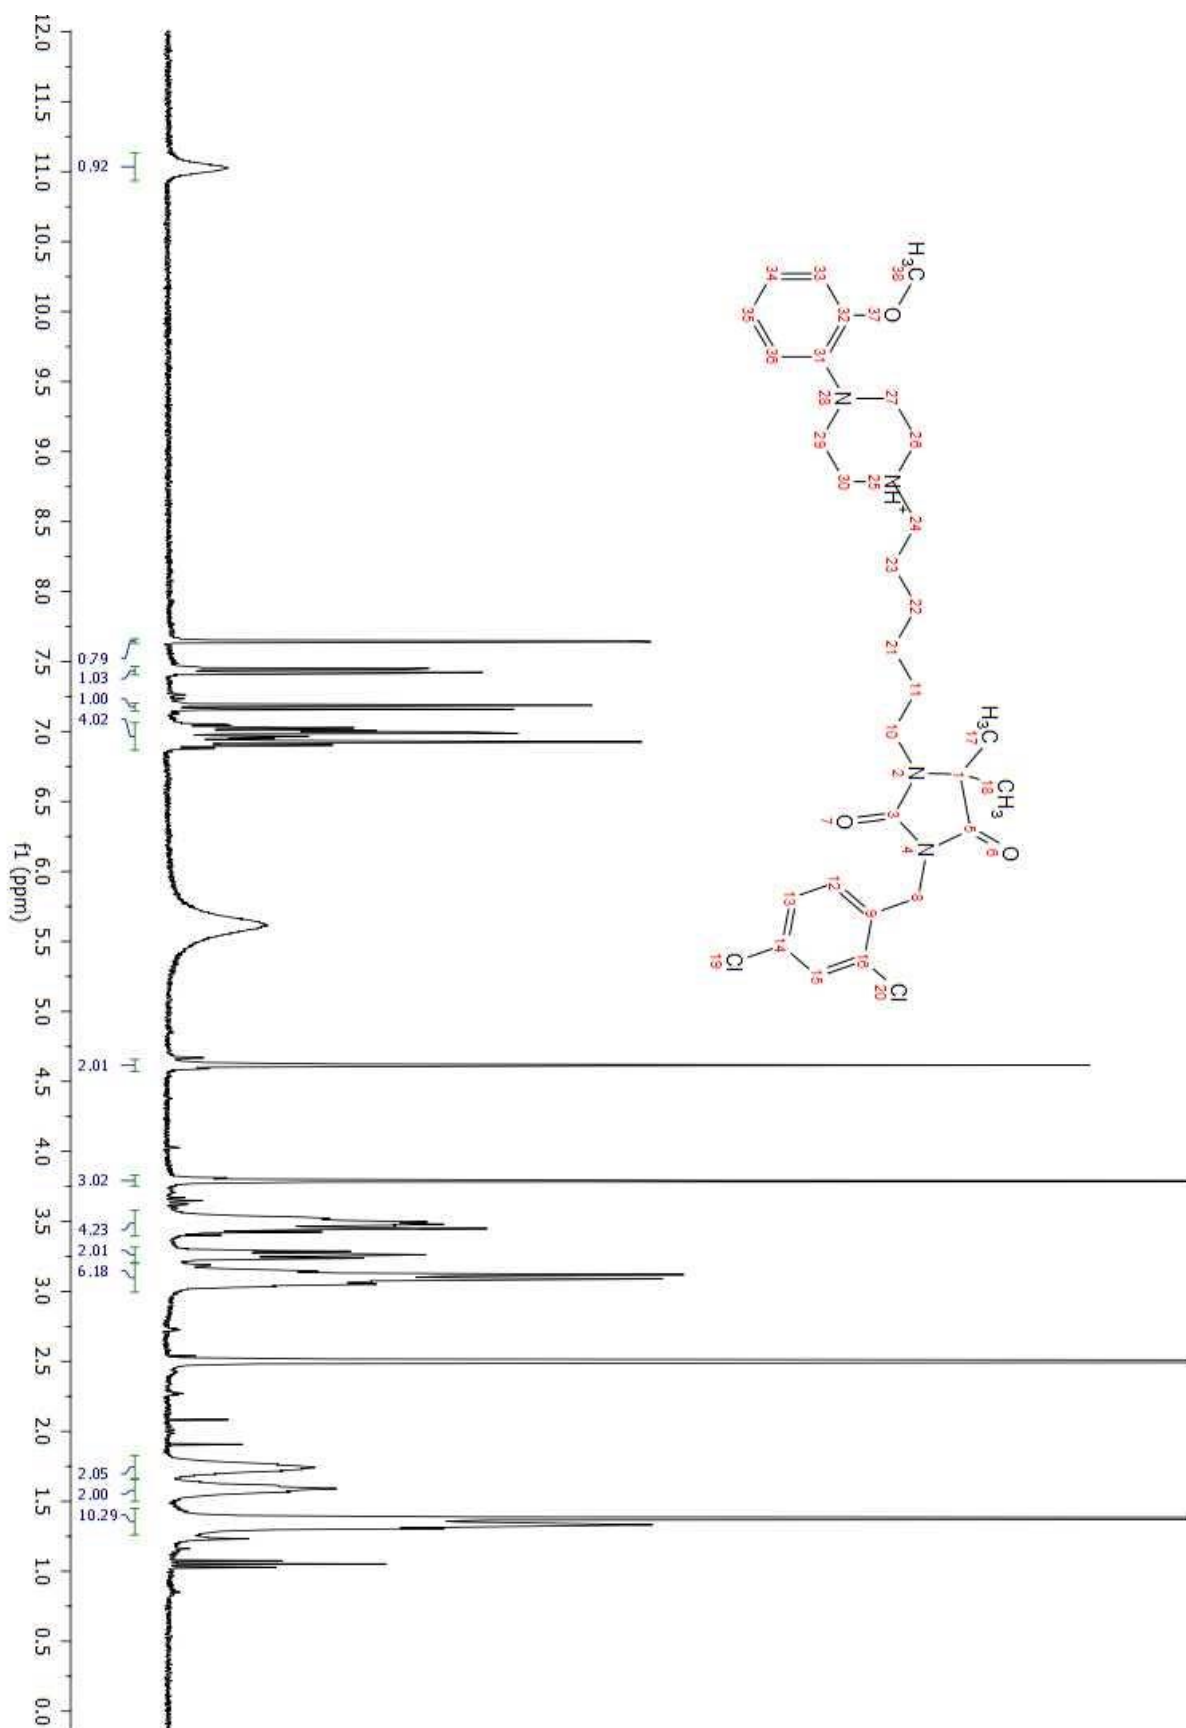

# Compound 6

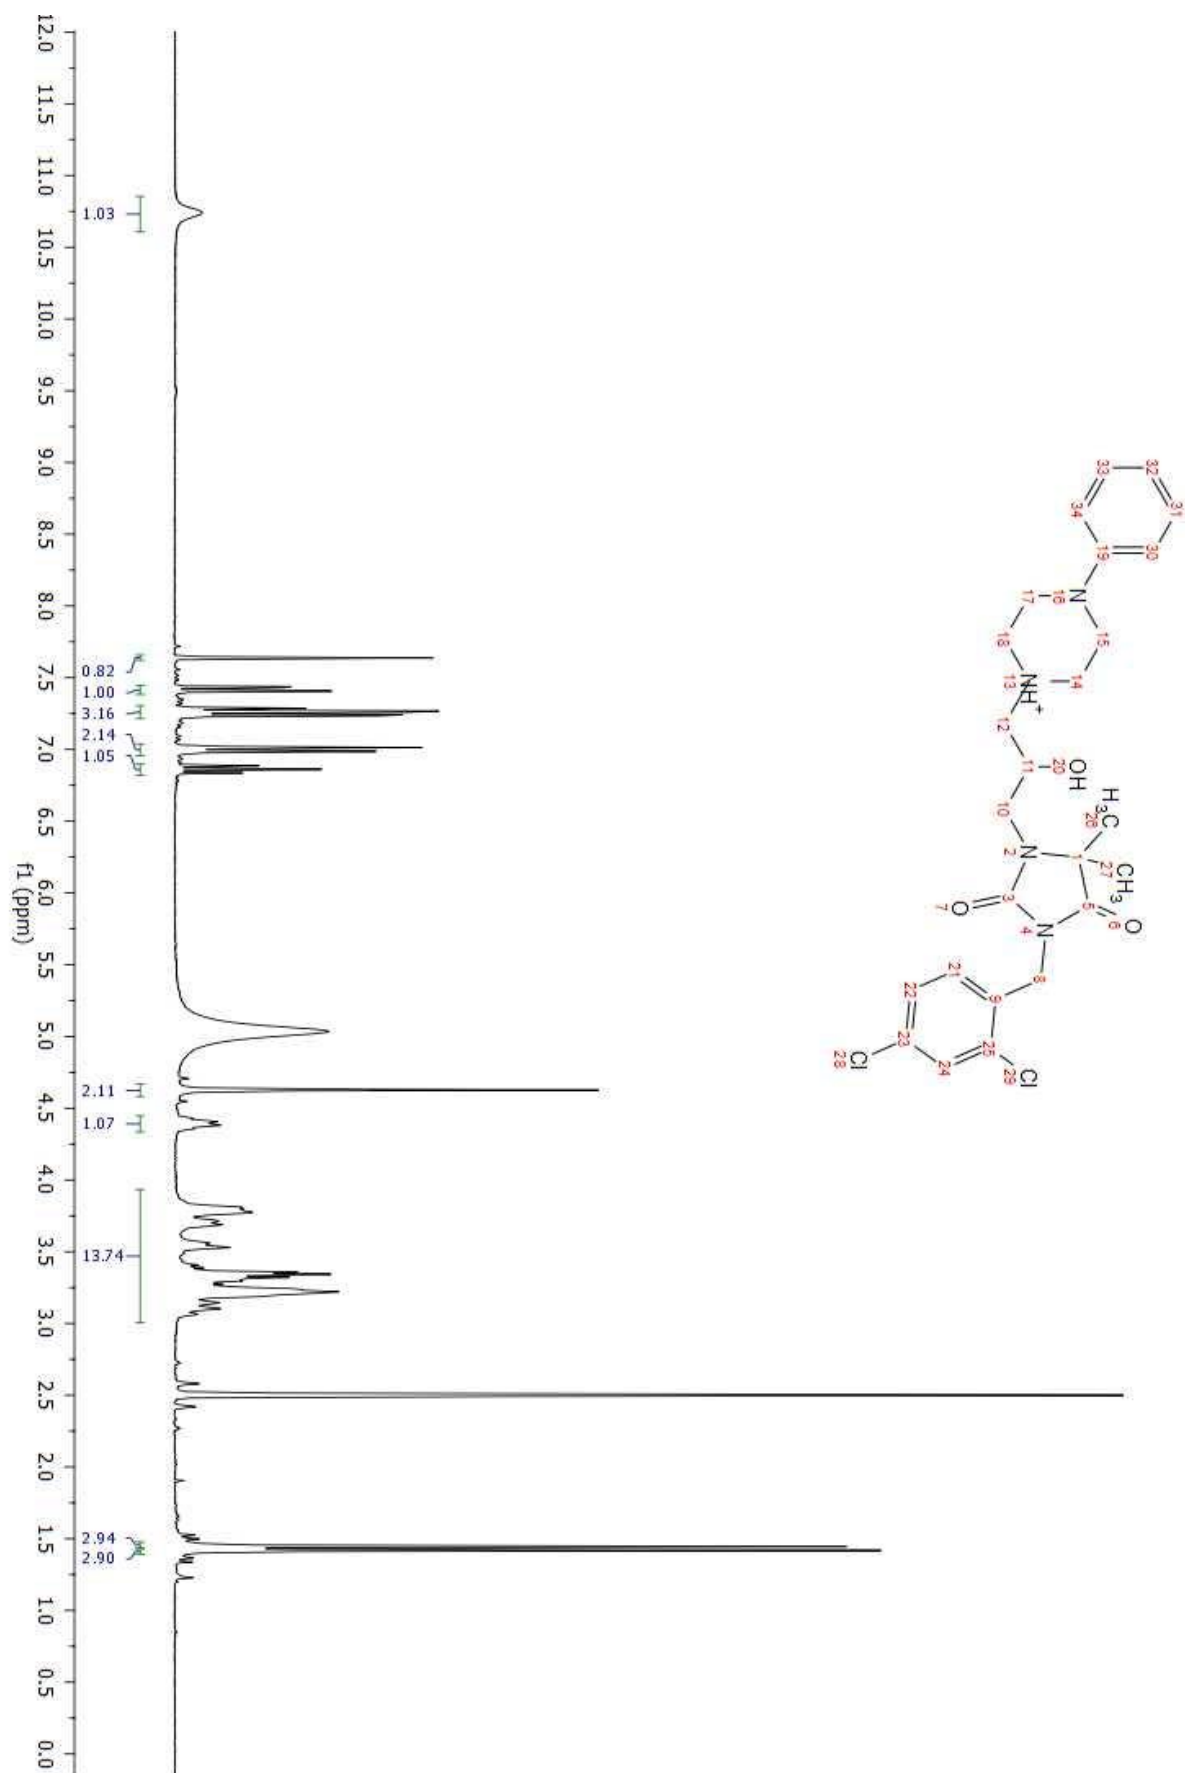



Compound 10

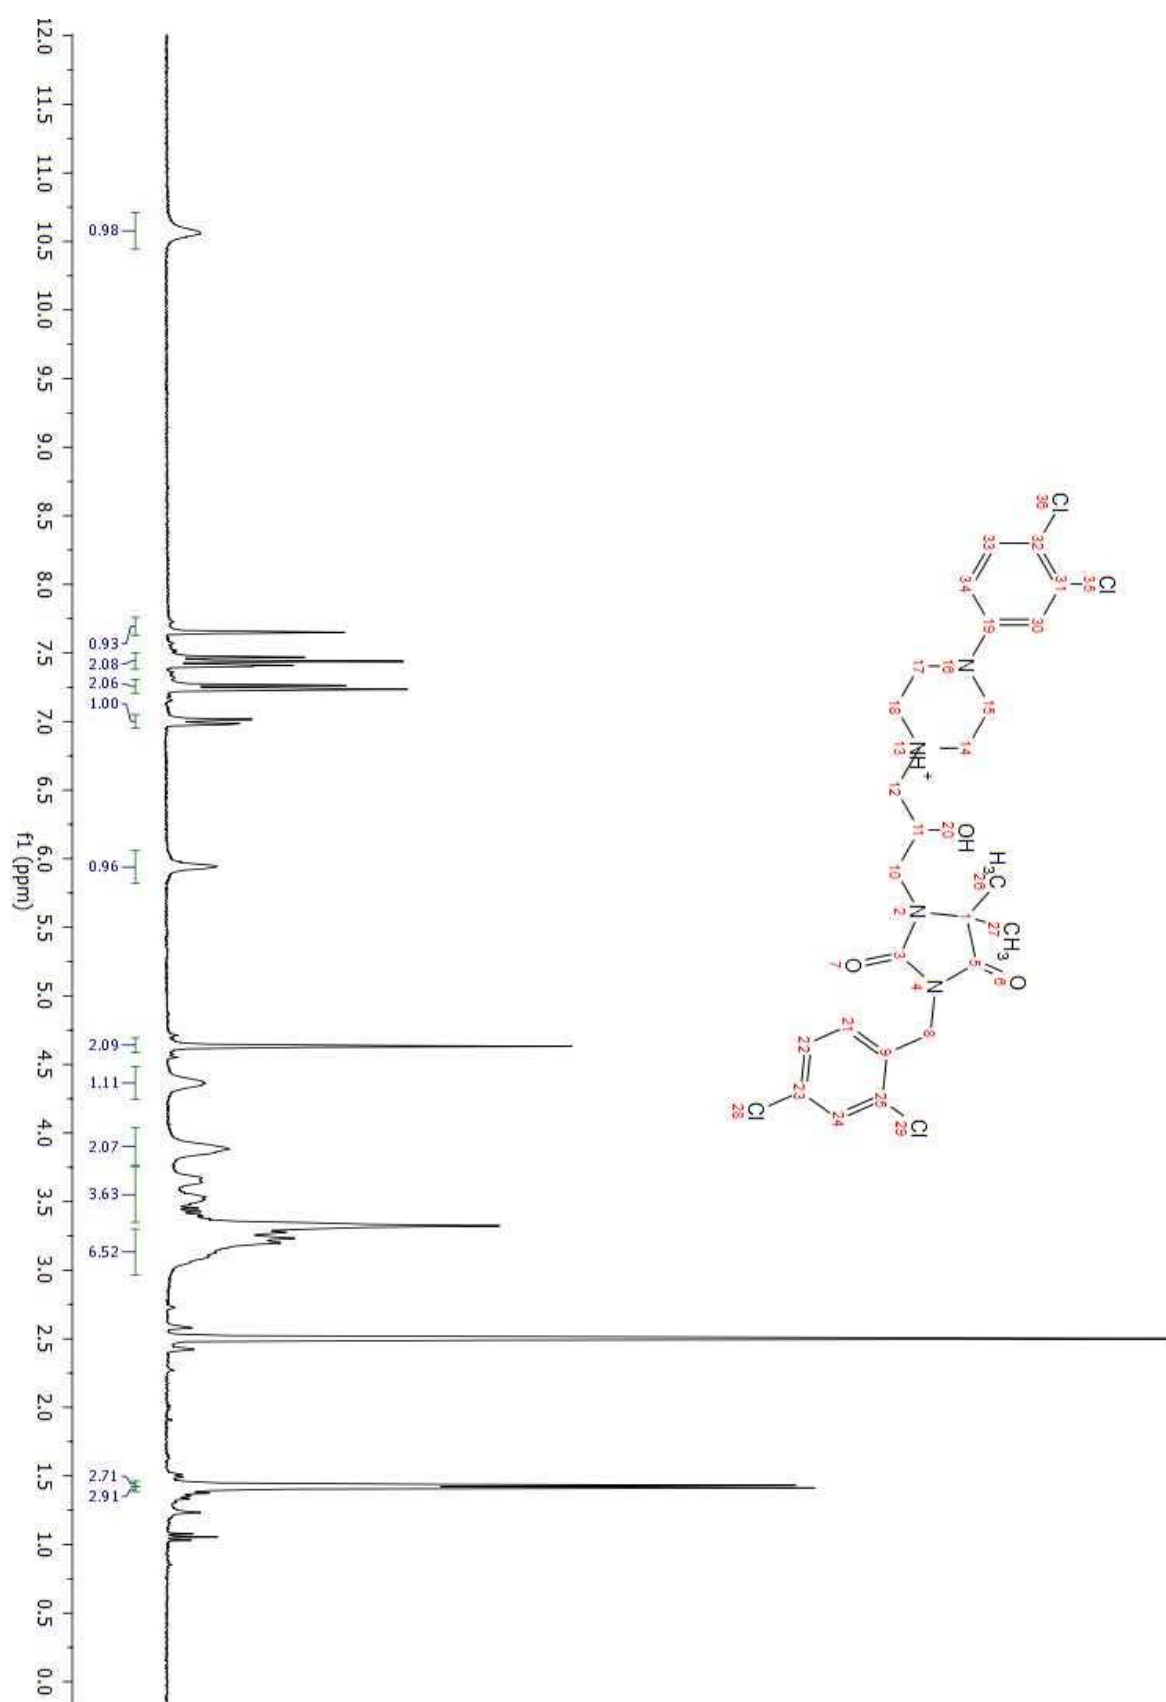

# Compound 11

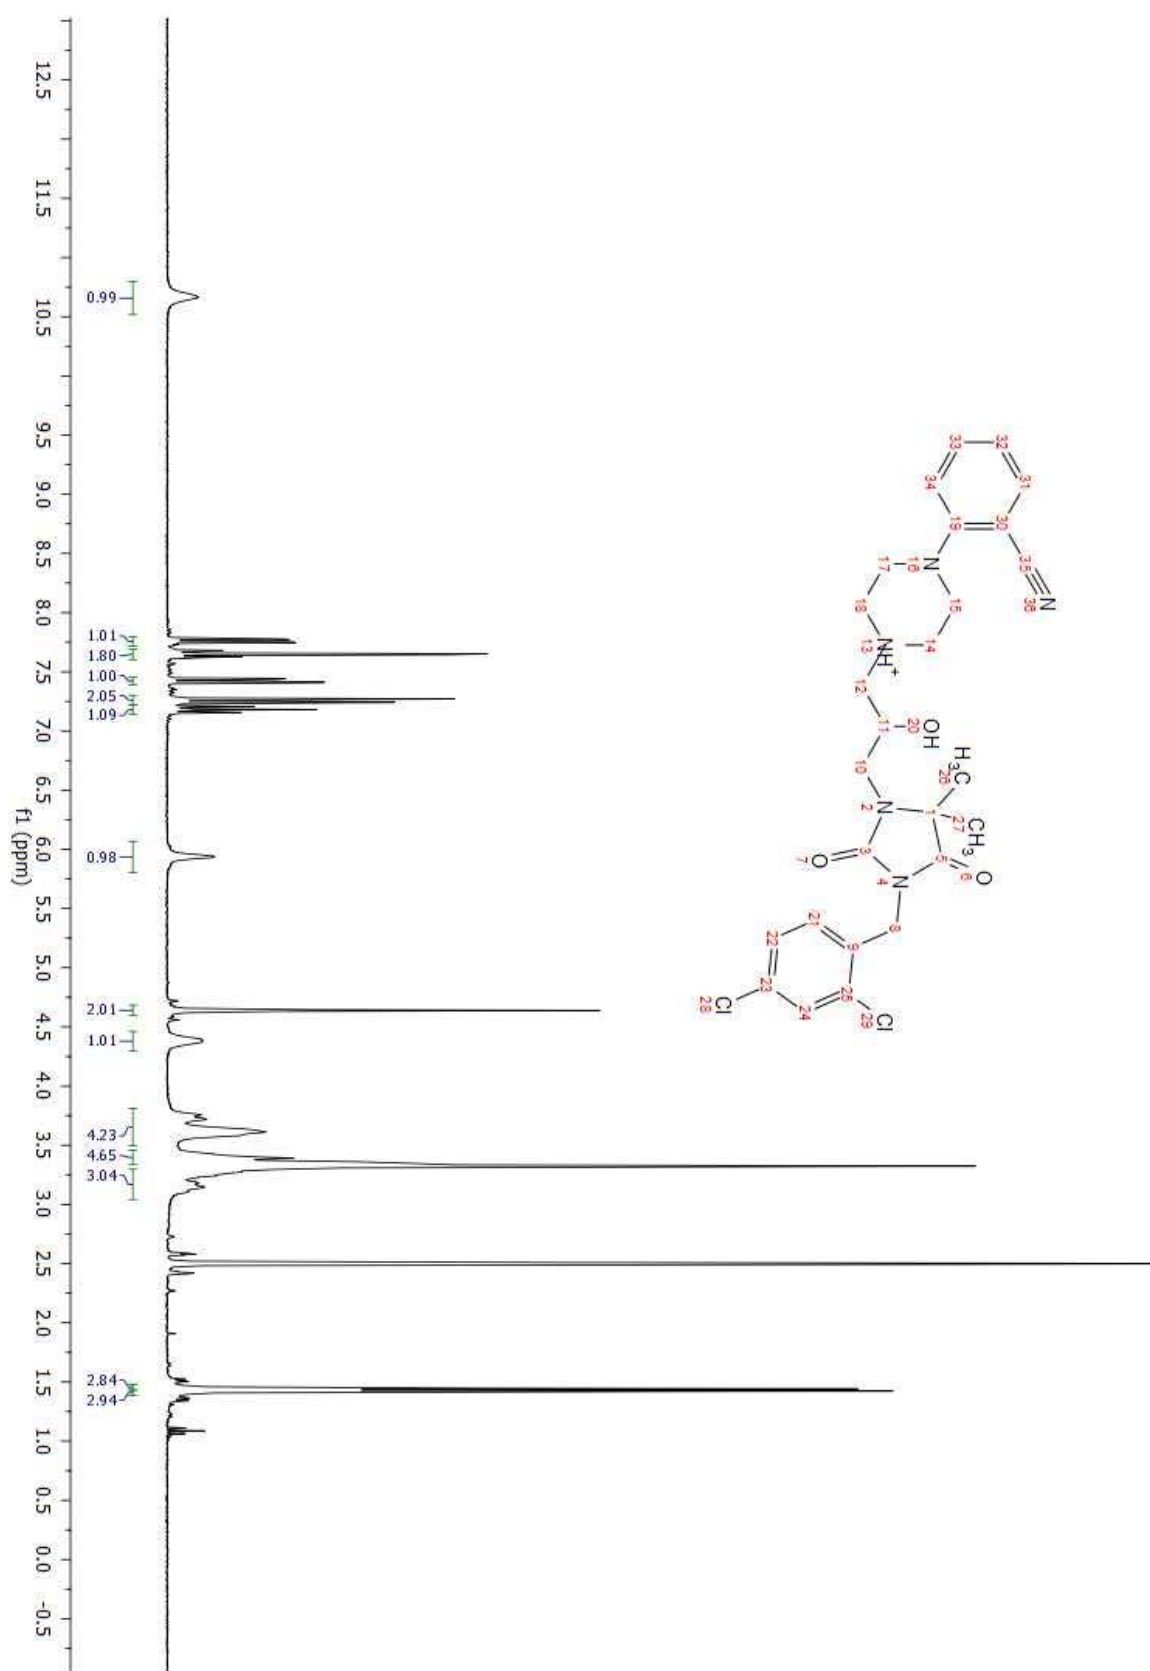

# Compound 12

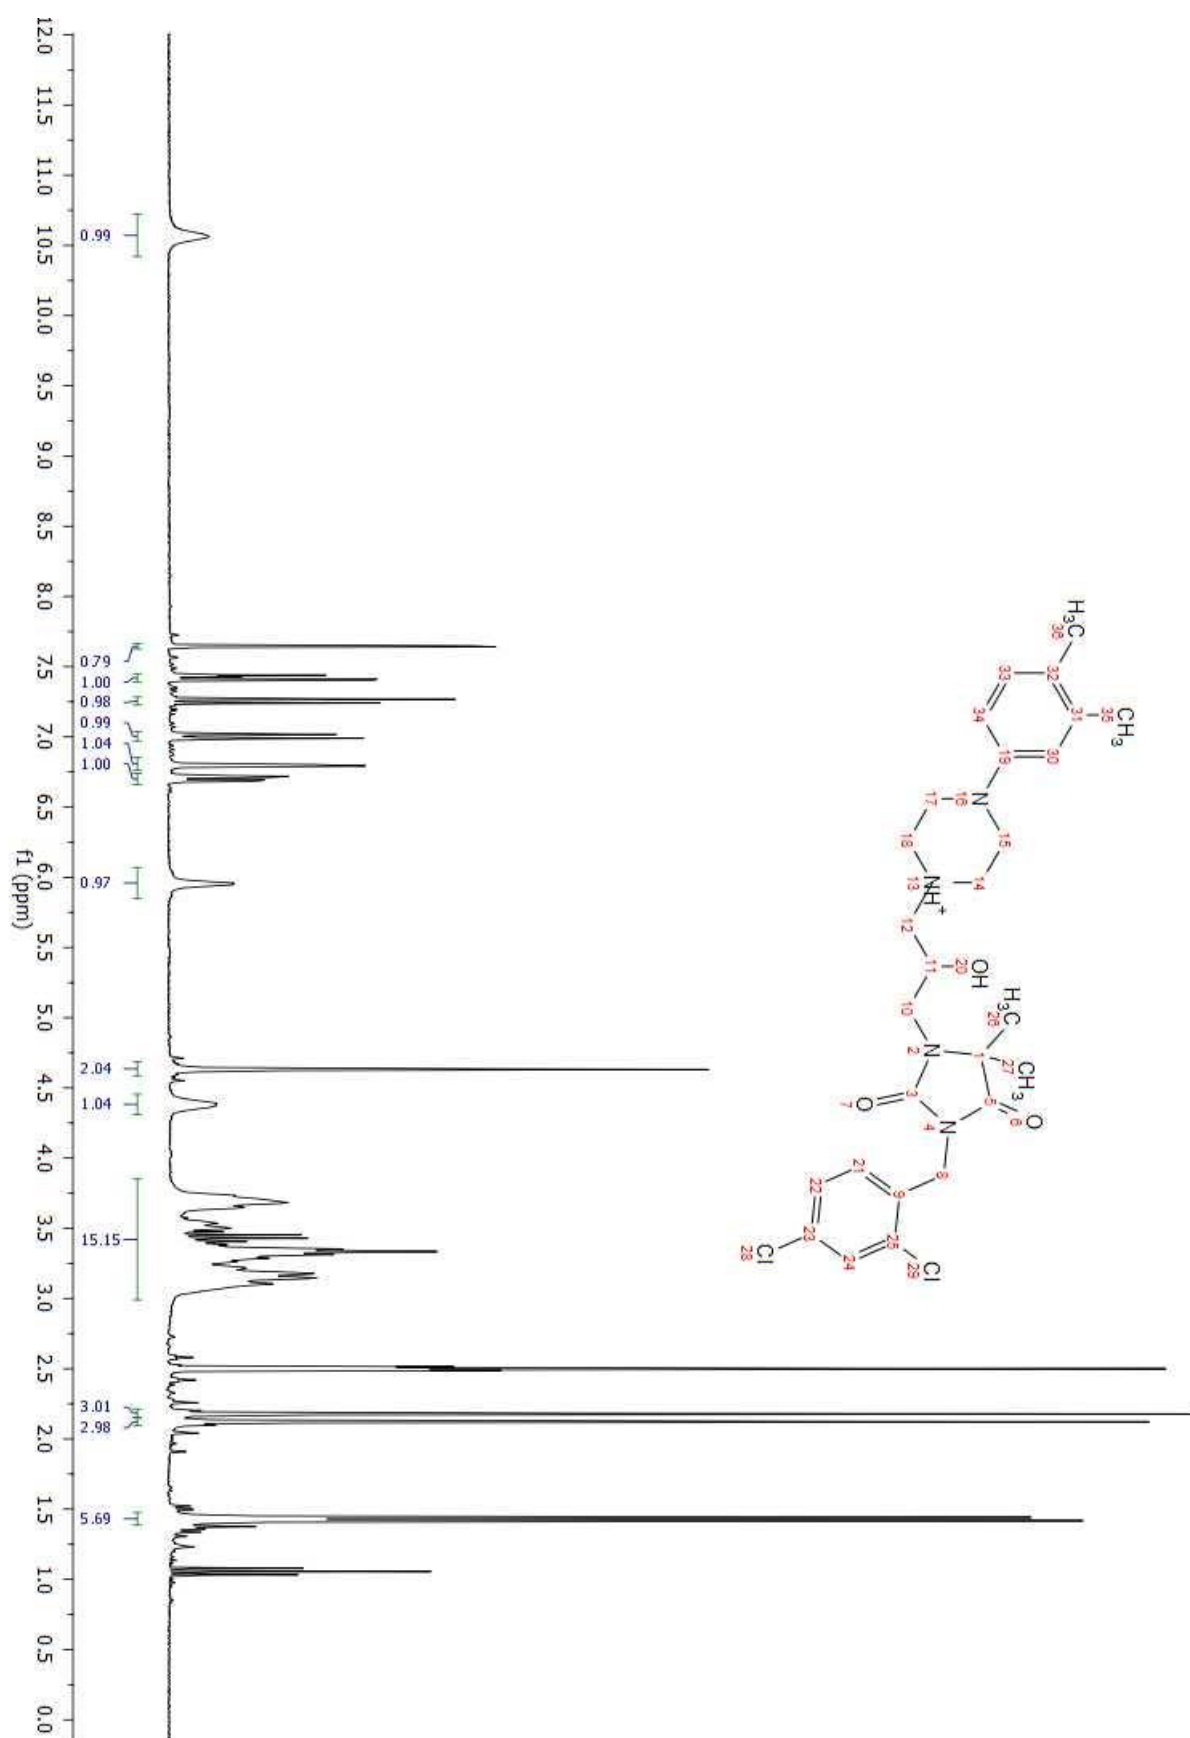

# Compound 13

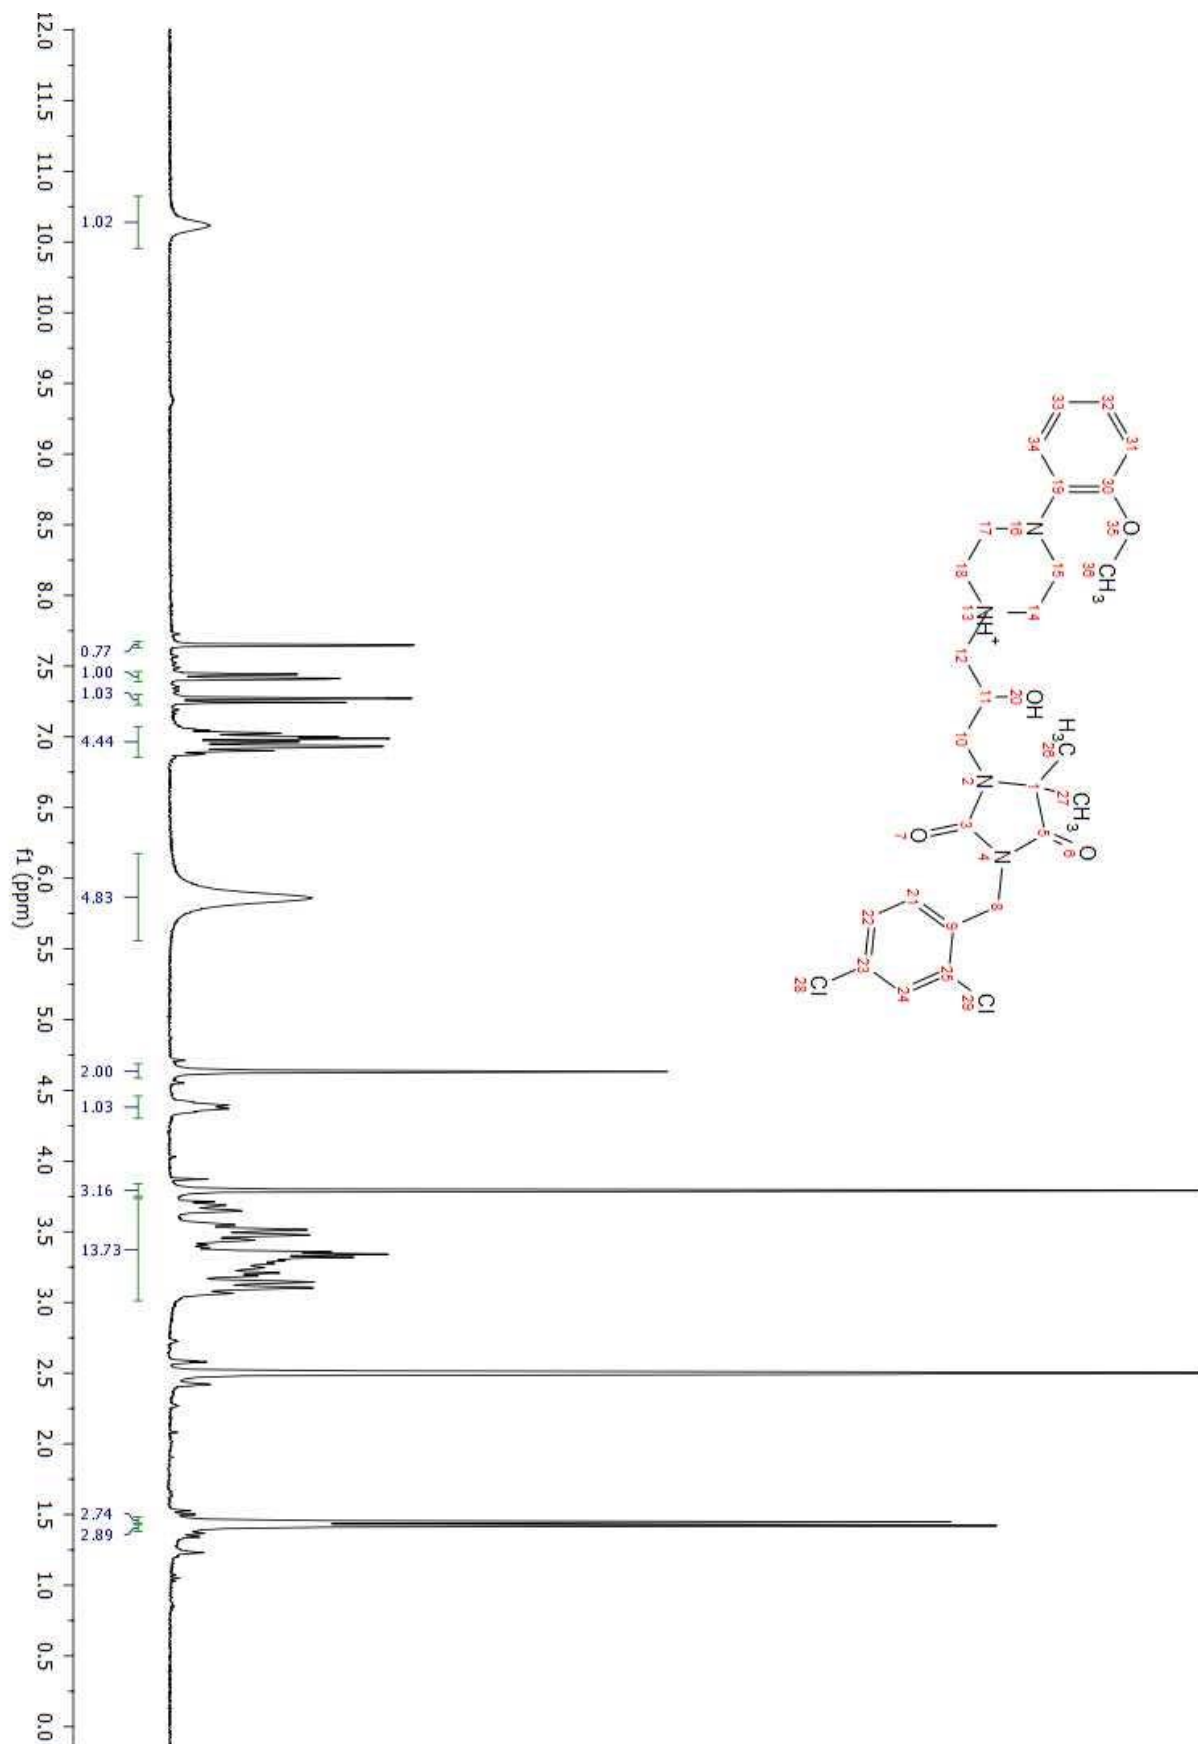

# Compound 14

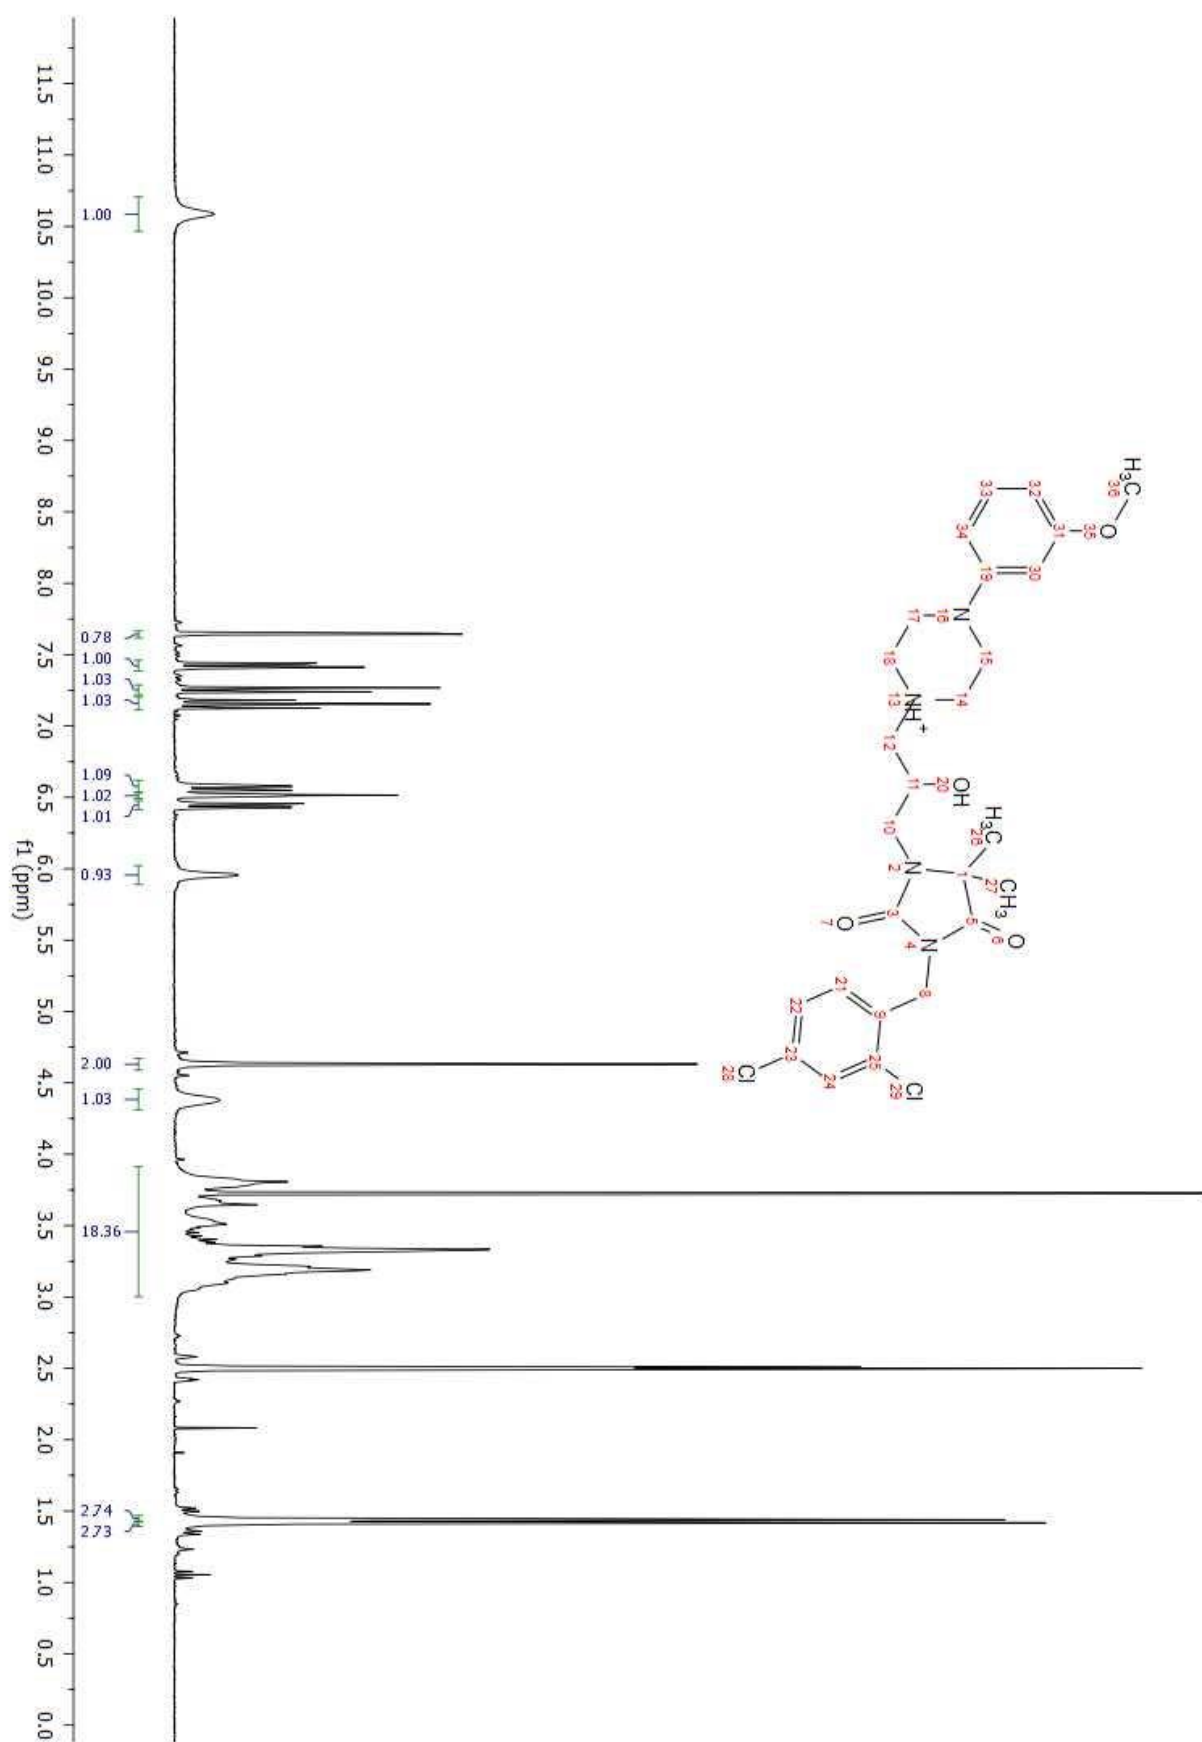

## The synthetic procedure for intermediate 17

3-(2,4-dichlorobenzyl)-5,5-dimethylimidazolidine-2,4-dione (**16**) (40 mmol, 11.48 g), potassium carbonate (11.58 mmol, 16.0 g), TEBA (5.27 mmol, 1.2 g) and acetone (80 ml) was stirred for 30 min. Then, 1,3-dibromopropan (60 mmol, 12.11 g) in acetone (40 ml) was added. It was stirred for 4 days. Filtration was carried out and filtrate was evaporated. To the residue, dichloromethane was added and mixture was washed three times with 1% sodium hydroxide and twice with water. Organic fractions were dried, then filtrated and evaporated. Crude product was purified from reaction mixture using column chromatography in dichloromethane:acetone (10:1). As these reaction has been well established in our team using analogous starting materials [1,2], the resulted white solid, pure according to TLC control was directly used for synthesis of final compounds.

1. Handzlik, J.; Bojarski, A. J.; Satała, G.; Kubacka, M.; Sadek, B.; Ashoor, A.; Siwek, A.; Więcek, M.; Kucwaj, K.; Filipek, B.; Kieć-Kononowicz, K. SAR-studies on the importance of aromatic ring topologies in search for selective 5-HT(7) receptor ligands among phenylpiperazine hydantoin derivatives. *Eur J Med Chem.* **2014**, *78*, 324–339. doi: 10.1016/j.ejmech.2014.01.065.
2. Kononowicz, K.; Handzlik, J. Phenylpiperazine 5,5-Dimethylhydantoin Derivatives as First Synthetic Inhibitors of Msr(A) Efflux Pump in *Staphylococcus epidermidis*. *Molecules.* **2020**, *25*, 3788. doi: 10.3390/molecules25173788.

## The influence on blood pressure in rats

**Table S1.** Influence on blood pressure for vehicle, tested compounds (1-3, 5-9, 11-14), and urapidil.

| Cpd     | Dose<br>(mg/kg) | Blood<br>pressure | Time of observation (min) |                 |                   |                   |                   |                  |                  |                   |
|---------|-----------------|-------------------|---------------------------|-----------------|-------------------|-------------------|-------------------|------------------|------------------|-------------------|
|         |                 |                   | 0                         | 5               | 10                | 20                | 30                | 40               | 50               | 60                |
| Vehicle | –               | Systolic          | 133.2<br>± 3.5            | 133.8<br>± 3.1  | 130.3<br>± 3.0    | 131.0<br>± 3.2    | 130.3<br>± 3.0    | 129.7<br>± 3.5   | 132.2<br>± 4.1   | 132.3<br>± 3.5    |
|         |                 | Diastolic         | 98.3<br>± 3.3             | 98.0<br>± 2.9   | 94.8<br>± 2.5     | 95.7<br>± 3.2     | 95.2<br>± 3.0     | 95.2<br>± 2.9    | 96.0<br>± 3.6    | 96.3<br>± 3.0     |
| 1       | 2.0             | Systolic          | 133.3<br>± 4.5            | 120.3<br>± 3.1  | 113.0<br>± 3.1**  | 112.2<br>± 3.6**  | 114.2<br>± 3.7*   | 114.7<br>± 3.9*  | 116.0<br>± 3.8*  | 117.5<br>± 4.3*   |
|         |                 | Diastolic         | 101.0<br>± 3.1            | 88.3<br>± 2.3   | 82.3<br>± 3.3*    | 82.2<br>± 4.2*    | 81.3<br>± 3.9*    | 80.8<br>± 3.1*   | 81.7<br>± 2.3*   | 83.3<br>± 2.1*    |
| 2       | 2.0             | Systolic          | 129.3<br>± 5.8            | 126.7<br>± 5.6  | 124.2<br>± 5.3    | 121.7<br>± 6.3    | 121.2<br>± 5.6    | 120.2<br>± 5.7   | 120.3<br>± 4.7   | 119.3<br>± 5.1    |
|         |                 | Diastolic         | 100.7<br>± 4.3            | 98.5<br>± 4.4   | 96.8<br>± 4.0     | 92.8<br>± 3.8     | 90.3<br>± 3.9     | 89.3<br>± 3.6    | 88.0<br>± 3.1    | 88.0<br>± 2.7     |
| 3       | 2.0             | Systolic          | 132.2<br>± 1.6            | 123.3<br>± 1.7  | 113.7<br>± 1.3*** | 113.0<br>± 2.2*** | 116.3<br>± 2.2**  | 116.3<br>± 1.9** | 120.3<br>± 1.7*  | 119.7<br>± 2.4*   |
|         |                 | Diastolic         | 93.7<br>± 2.5             | 90.3<br>± 2.0   | 81.2<br>± 2.3**   | 81.7<br>± 2.6**   | 83.2<br>± 2.4*    | 82.7<br>± 2.1*   | 84.2<br>± 2.6*   | 83.8<br>± 3.3*    |
| 5       | 0.0625          | Systolic          | 128.8<br>± 2.0            | 121.0<br>± 3.0* | 116.8<br>± 2.6**  | 114.2<br>± 2.3*** | 113.3<br>± 2.0*** | 114.7<br>± 1.4** | 116.8<br>± 0.6** | 116.3<br>± 1.2*** |
|         |                 | Diastolic         | 92.0<br>± 1.9             | 87.7<br>± 1.6*  | 84.2<br>± 1.6*    | 81.7<br>± 1.8**   | 82.7<br>± 1.5**   | 81.7<br>± 2.2**  | 81.8<br>± 1.6**  | 83.3<br>± 2.3**   |
| 6       | 2.0             | Systolic          | 134.2<br>± 2.8            | 124.2<br>± 4.2  | 125.2<br>± 3.7    | 126.3<br>± 3.6    | 125.0<br>± 4.0    | 126.7<br>± 3.9   | 125.5<br>± 4.4   | 125.8<br>± 3.6    |
|         |                 | Diastolic         | 98.2<br>± 3.5             | 87.2<br>± 4.8   | 90.3<br>± 4.7     | 89.7<br>± 4.4     | 89.0<br>± 4.7     | 89.0<br>± 4.5    | 89.2<br>± 5.1    | 88.7<br>± 4.6     |
| 7       | 2.0             | Systolic          | 137.8<br>± 5.5            | 125.3<br>± 5.7  | 124.3<br>± 5.9    | 121.8<br>± 5.6    | 123.8<br>± 6.0    | 123.7<br>± 5.7   | 122.7<br>± 6.0   | 121.5<br>± 6.5    |
|         |                 | Diastolic         | 103.2<br>± 2.5            | 91.5<br>± 4.2   | 91.0<br>± 4.4     | 93.0<br>± 4.6     | 92.0<br>± 3.9     | 94.3<br>± 4.7    | 93.2<br>± 5.2    | 91.3<br>± 4.2     |
| 8       | 2.0             | Systolic          | 129.2<br>± 6.9            | 121.5<br>± 5.7  | 120.5<br>± 6.3    | 120.0<br>± 6.7    | 120.2<br>± 6.7    | 119.5<br>± 6.1   | 120.0<br>± 6.5   | 119.0<br>± 6.1    |
|         |                 | Diastolic         | 96.7<br>± 5.9             | 87.8<br>± 6.5   | 89.0<br>± 6.6     | 88.2<br>± 5.9     | 86.5<br>± 5.5     | 84.7<br>± 5.2    | 85.5<br>± 4.2    | 84.3<br>± 4.6     |
| 9       | 2.0             | Systolic          | 135.2<br>± 8.0            | 133.3<br>± 5.5  | 127.0<br>± 6.5    | 125.0<br>± 7.2    | 128.2<br>± 7.0    | 128.2<br>± 5.5   | 127.2<br>± 5.0   | 122.0<br>± 5.3    |
|         |                 | Diastolic         | 100.3<br>± 6.1            | 98.2<br>± 4.4   | 93.5<br>± 3.3     | 90.8<br>± 4.0     | 93.2<br>± 5.0     | 92.0<br>± 4.9    | 90.3<br>± 5.1    | 87.3<br>± 3.8     |
| 11      | 2.0             | Systolic          | 128.5<br>± 5.2            | 117.0<br>± 3.8  | 112.8<br>± 5.1    | 113.0<br>± 5.6    | 112.5<br>± 5.9    | 113.8<br>± 5.8   | 116.3<br>± 6.0   | 118.2<br>± 6.4    |
|         |                 | Diastolic         | 91.7<br>± 4.0             | 84.0<br>± 4.4   | 80.7<br>± 5.3     | 79.7<br>± 5.6     | 79.8<br>± 5.9     | 82.0<br>± 5.9    | 82.3<br>± 5.7    | 81.7<br>± 6.1     |
| 12      | 2.0             | Systolic          | 139.0                     | 134.7           | 134.5             | 132.0             | 131.0             | 129.0            | 130.0            | 128.0             |

|                 |     |           |       |         |         |        |        |        |        |        |
|-----------------|-----|-----------|-------|---------|---------|--------|--------|--------|--------|--------|
| <b>13</b>       | 2.0 | Diastolic | ± 2.3 | ± 2.4   | ± 2.2   | ± 3.1  | ± 3.3  | ± 3.7  | ± 3.9  | ± 3.7  |
|                 |     |           | 104.2 | 98.2    | 99.5    | 97.8   | 96.7   | 97.0   | 96.8   | 97.3   |
|                 |     | Systolic  | ± 1.2 | ± 1.9   | ± 2.1   | ± 1.8  | ± 2.1  | ± 2.0  | ± 2.4  | ± 2.0  |
|                 |     |           | 130.7 | 102.8   | 107.7   | 109.3  | 112.7  | 113.3  | 117.2  | 118.0  |
|                 |     |           | ± 4.6 | ±       | ±       | ±      | ±      | ± 3.0* | ± 4.5* | ± 3.3* |
|                 |     |           |       | 3.4**** | 2.5**** | 2.7*** | 3.8**  |        |        |        |
| <b>14</b>       | 2.0 | Diastolic | 98.0  | 61.2    | 70.8    | 77.3   | 82.2   | 82.8   | 82.2   | 83.7   |
|                 |     |           | ± 3.2 | ±       | ±       | ±      | ± 3.3* | ± 3.0* | ± 3.2* | ± 3.2* |
|                 |     | Systolic  | 132.5 | 132.3   | 132.0   | 129.3  | 127.7  | 125.8  | 124.5  | 124.3  |
|                 |     |           | ± 4.0 | ± 3.9   | ± 4.2   | ± 4.4  | ± 3.8  | ± 4.6  | ± 4.5  | ± 4.1  |
|                 |     | Diastolic | 100.8 | 100.3   | 100.7   | 96.0   | 96.0   | 97.3   | 94.3   | 92.0   |
|                 |     |           | ± 4.6 | ± 4.3   | ± 4.6   | ± 4.0  | ± 5.1  | ± 4.7  | ± 4.7  | ± 4.7  |
| <b>Urapidil</b> | 1.0 | Systolic  | 127.3 | 111.3   | 109.5   | 110.2  | 112.2  | 112.7  | 114.0  | 115.0  |
|                 |     |           | ± 2.9 | ±       | ±       | ±      | ±      | ±      | ±      | ±      |
|                 |     | Diastolic | 93.0  | 77.5    | 75.5    | 76.0   | 78.8   | 79.2   | 80.8   | 81.2   |
|                 |     |           | ± 2.7 | ±       | ±       | ±      | ±      | ±      | ± 2.8* | ± 2.3* |
|                 |     |           |       | 4.9***  | 3.9***  | 3.8*** | 3.5**  | 2.9**  |        |        |
|                 |     |           |       |         |         |        |        |        |        |        |

Data represent the mean ± SEM (n = 6 rats per each group). Statistical analysis: two-way ANOVA and Sidak's multiple comparisons test. Statistically significant: \*p < 0.05, \*\*p < 0.02, \*\*\*p < 0.01, \*\*\*\*p < 0.001 vs. control group (vehicle treatment).
